# Supplementary material for: Cell-Friendly Chitosan-Xanthan Gum Membranes Incorporating Hydroxyapatite Designed for Periodontal Tissue Regeneration
Source: MDPI journal article supplement (doi:10.3390/pharmaceutics15020705), 2023-02-20
Supplement: s1 [file s1]

## **SUPPLEMENTARY MATERIAL**

### **Cell-friendly chitosan-xanthan gum membranes incorporating hydroxyapatite designed for periodontal tissue regeneration**

**Rafael Maza Barbosa<sup>1,2</sup>, Daniel Navarro da Rocha<sup>2</sup>, Renata Fracielle Bombaldi de Souza<sup>1</sup>, Jheison L. Santos<sup>3</sup>, José Ricardo M. Ferreira<sup>2</sup>, Ângela M. Moraes <sup>1,\*</sup>**

<sup>1</sup> Department of Engineering of Materials and of Bioprocesses, School of Chemical Engineering, University of Campinas, Campinas 13083-852, SP, Brazil

<sup>2</sup> Department of Bioengineering, R-Crio Stem Cells, Campinas 13098-324, SP, Brazil

<sup>3</sup> Department of Physics, Federal Rural University of Rio de Janeiro, Rio de Janeiro 23890-000, RJ, Brazil

\* Correspondence: ammoraes@unicamp.br; Tel.: +55-19-3521-3921

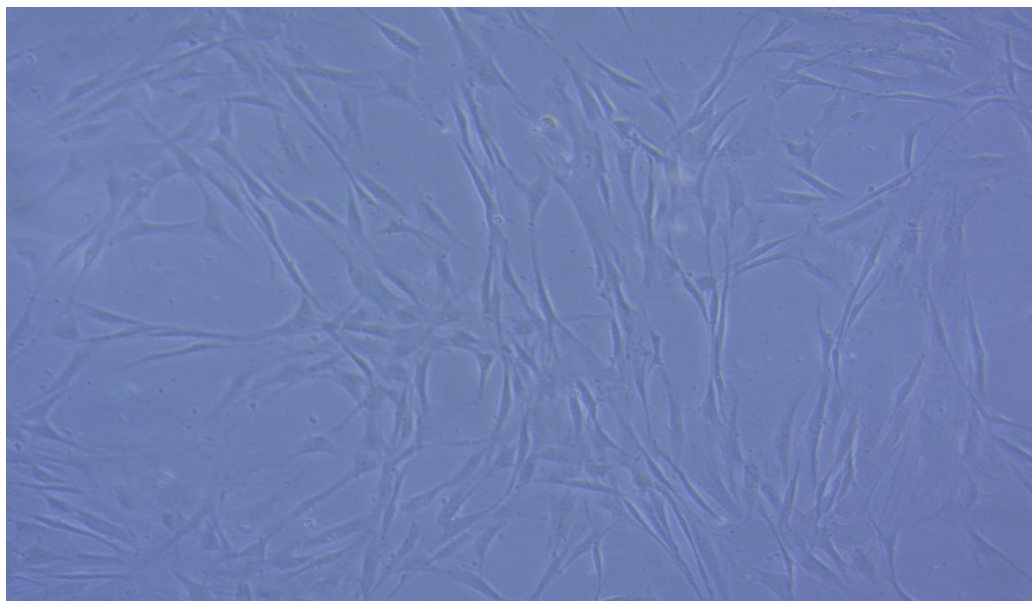

**Figure S1** – Typical morphology of the DPSC cell line used in the *in vitro* assays observed by optical microscopy (10X objective).

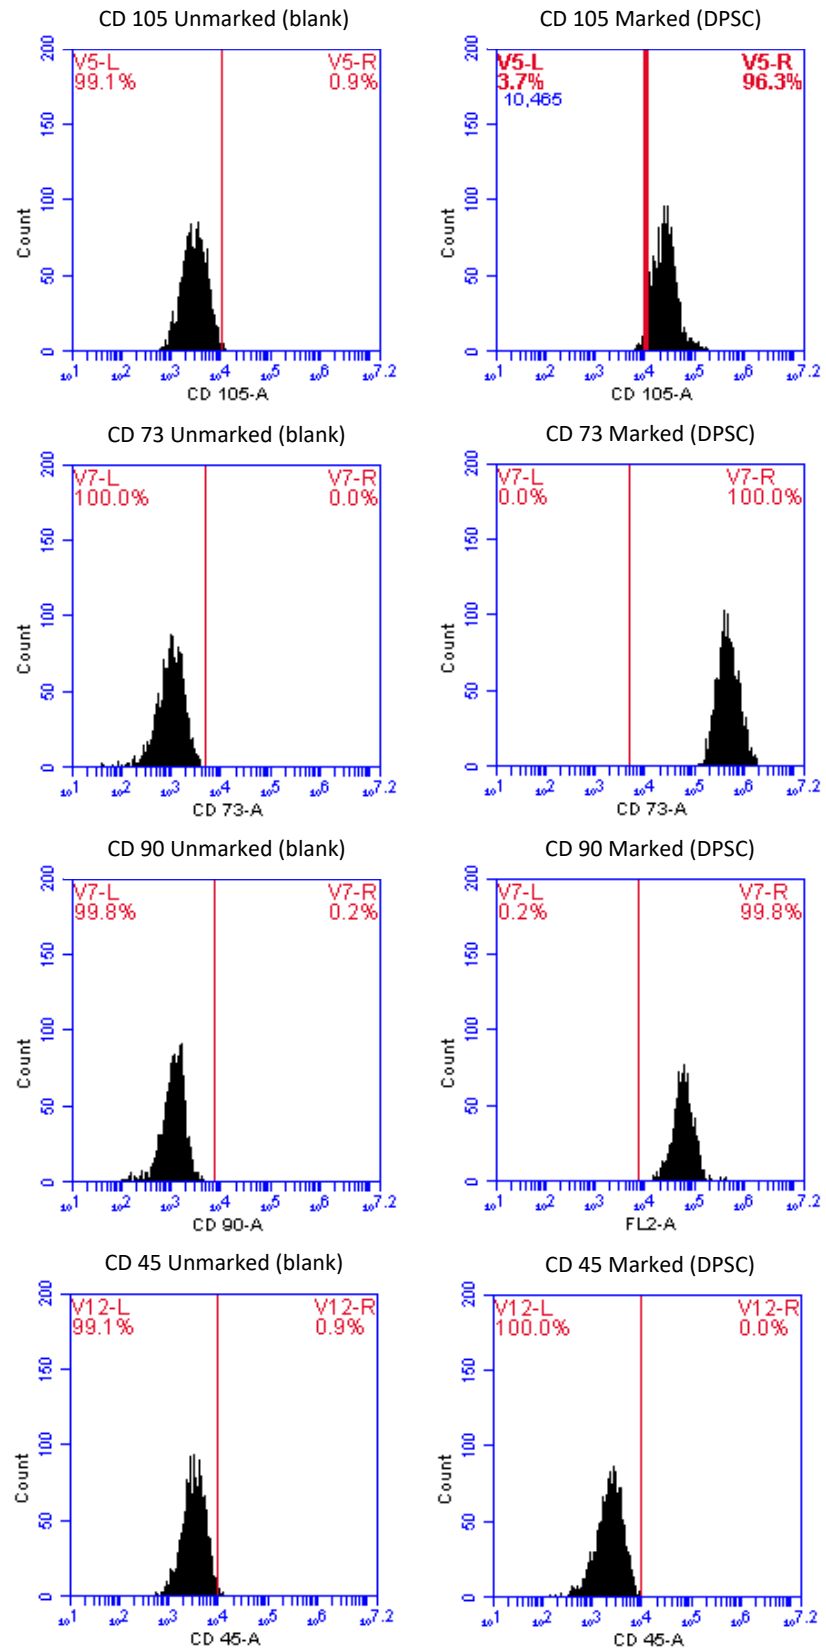

**Figure S2** – Histograms obtained by immunophenotyping the DPSC analyzed by flow cytometry.

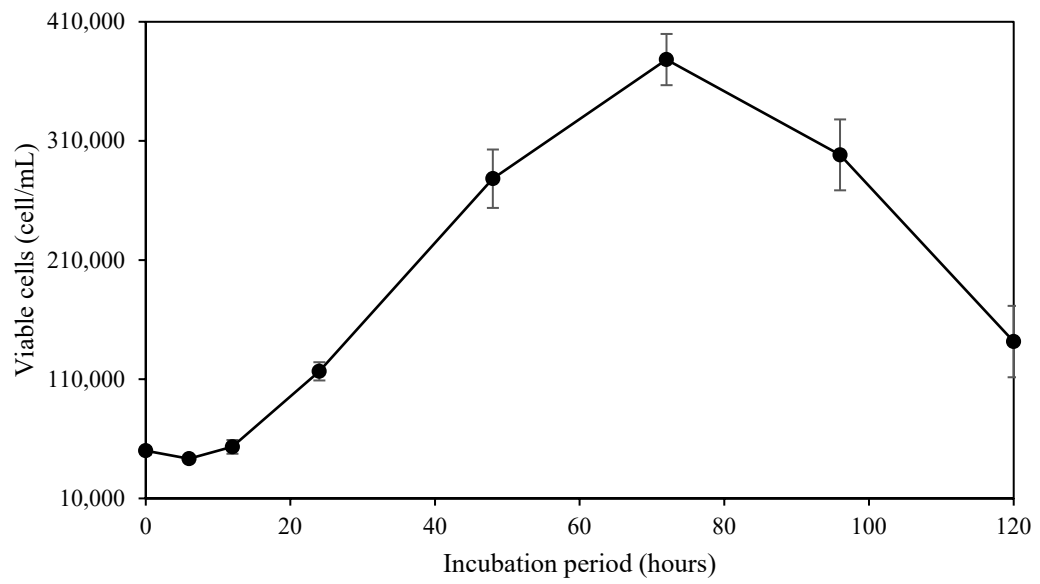

**Figure S3** – Growth curve of the dental pulp mesenchymal cells obtained in *in vitro* culture using 6-well polystyrene plates, expressed in terms of the variation of viable cell concentration with time. The culture medium was changed every 72 h.

**Table S1** – Values obtained from immunophenotyping markers by flow cytometry for the cell population in the 8<sup>th</sup> passage (BD – model: Accuri C6).

| Immunophenotyping | Markers |       |       |       |
|-------------------|---------|-------|-------|-------|
|                   | CD 105  | CD 90 | CD 73 | CD 45 |
| Expression (%)    | 96.3    | 99.8  | 100.0 | 0.9   |

**Table S2** – Absorbance of positive controls for MTT tests.

| Time (h) | Absorbance at 560 nm |
|----------|----------------------|
| 24       | 0.683 ± 0.06         |
| 48       | 1.017 ± 0.02         |
| 72       | 0.8517 ± 0.01        |

**Table S3** – Percentage of cells which proliferate on the surface of the culture plate, in the neighborhood of membranes exposing Side 1, when compared to control cell culture experiments.

| Time (h) | Cell proliferation on the neighborhood of membranes – Side 1 (%) |                                                 |                                               |                                                |
|----------|------------------------------------------------------------------|-------------------------------------------------|-----------------------------------------------|------------------------------------------------|
|          | C <sub>1</sub> X <sub>1</sub> HA <sub>0</sub>                    | C <sub>1</sub> X <sub>1</sub> HA <sub>0.4</sub> | C <sub>1</sub> X <sub>1</sub> HA <sub>2</sub> | C <sub>1</sub> X <sub>1</sub> HA <sub>10</sub> |
| 24       | 62.44 ± 5.21 <sup>a,A</sup>                                      | 42.16 ± 8.11 <sup>b,A</sup>                     | 28.23 ± 3.36 <sup>c,A</sup>                   | 13.99 ± 1.19 <sup>d,A</sup>                    |
| 48       | 22.33 ± 5.59 <sup>a,B</sup>                                      | 42.16 ± 5.31 <sup>b,A</sup>                     | 39.69 ± 2.20 <sup>b,A</sup>                   | 18.09 ± 7.94 <sup>a,A</sup>                    |
| 72       | 53.36 ± 11.30 <sup>a,A</sup>                                     | 74.46 ± 2.93 <sup>a,B</sup>                     | 55.30 ± 7.90 <sup>a,B</sup>                   | 20.55 ± 9.75 <sup>b,A</sup>                    |

Different lowercase letters in the same line and different capital letters in the same column indicate a significant difference between the mean values (Tukey's test,  $p < 0.05$ ). \*Percentage values consider optic density at 560 nm between the 0.000 - 1.000 range.

**Table S4** – Percentage of cells which proliferate on the surface of the culture plate in the neighborhood of membranes exposing Side 2, when compared to control cell culture experiments.

| Time (h)  | Cell proliferation on the neighborhood of membranes – Side 2 (%) |                                                 |                                               |                                                |
|-----------|------------------------------------------------------------------|-------------------------------------------------|-----------------------------------------------|------------------------------------------------|
|           | C <sub>1</sub> X <sub>1</sub> HA <sub>0</sub>                    | C <sub>1</sub> X <sub>1</sub> HA <sub>0.4</sub> | C <sub>1</sub> X <sub>1</sub> HA <sub>2</sub> | C <sub>1</sub> X <sub>1</sub> HA <sub>10</sub> |
| <b>24</b> | 58.68 ± 10.39 <sup>a,A</sup>                                     | 48.21 ± 7.38 <sup>a,b,A</sup>                   | 33.38 ± 6.41 <sup>b,A</sup>                   | 10.22 ± 2.60 <sup>c,A</sup>                    |
| <b>48</b> | 38.99 ± 15.29 <sup>a,A</sup>                                     | 46.51 ± 5.99 <sup>a,A</sup>                     | 36.86 ± 4.76 <sup>a,b,A</sup>                 | 15.51 ± 1.24 <sup>b,A</sup>                    |
| <b>72</b> | 53.48 ± 11.99 <sup>a,A</sup>                                     | 61.03 ± 9.16 <sup>a,A</sup>                     | 43.30 ± 10.86 <sup>a,A</sup>                  | 17.04 ± 5.33 <sup>b,A</sup>                    |

Different lowercase letters in the same line and different capital letters in the same column indicate a significant difference between the mean values (Tukey's test,  $p < 0.05$ ). \*Percentage values consider optic density at 560 nm between the 0.000 - 1.000 range.
